# Supplementary material
Source: PubMed Central journal article supplement (PMC5411510)
Supplement: AEM.02990-16_zam999117833s1.pdf [file AEM.02990-16_zam999117833s1.pdf]

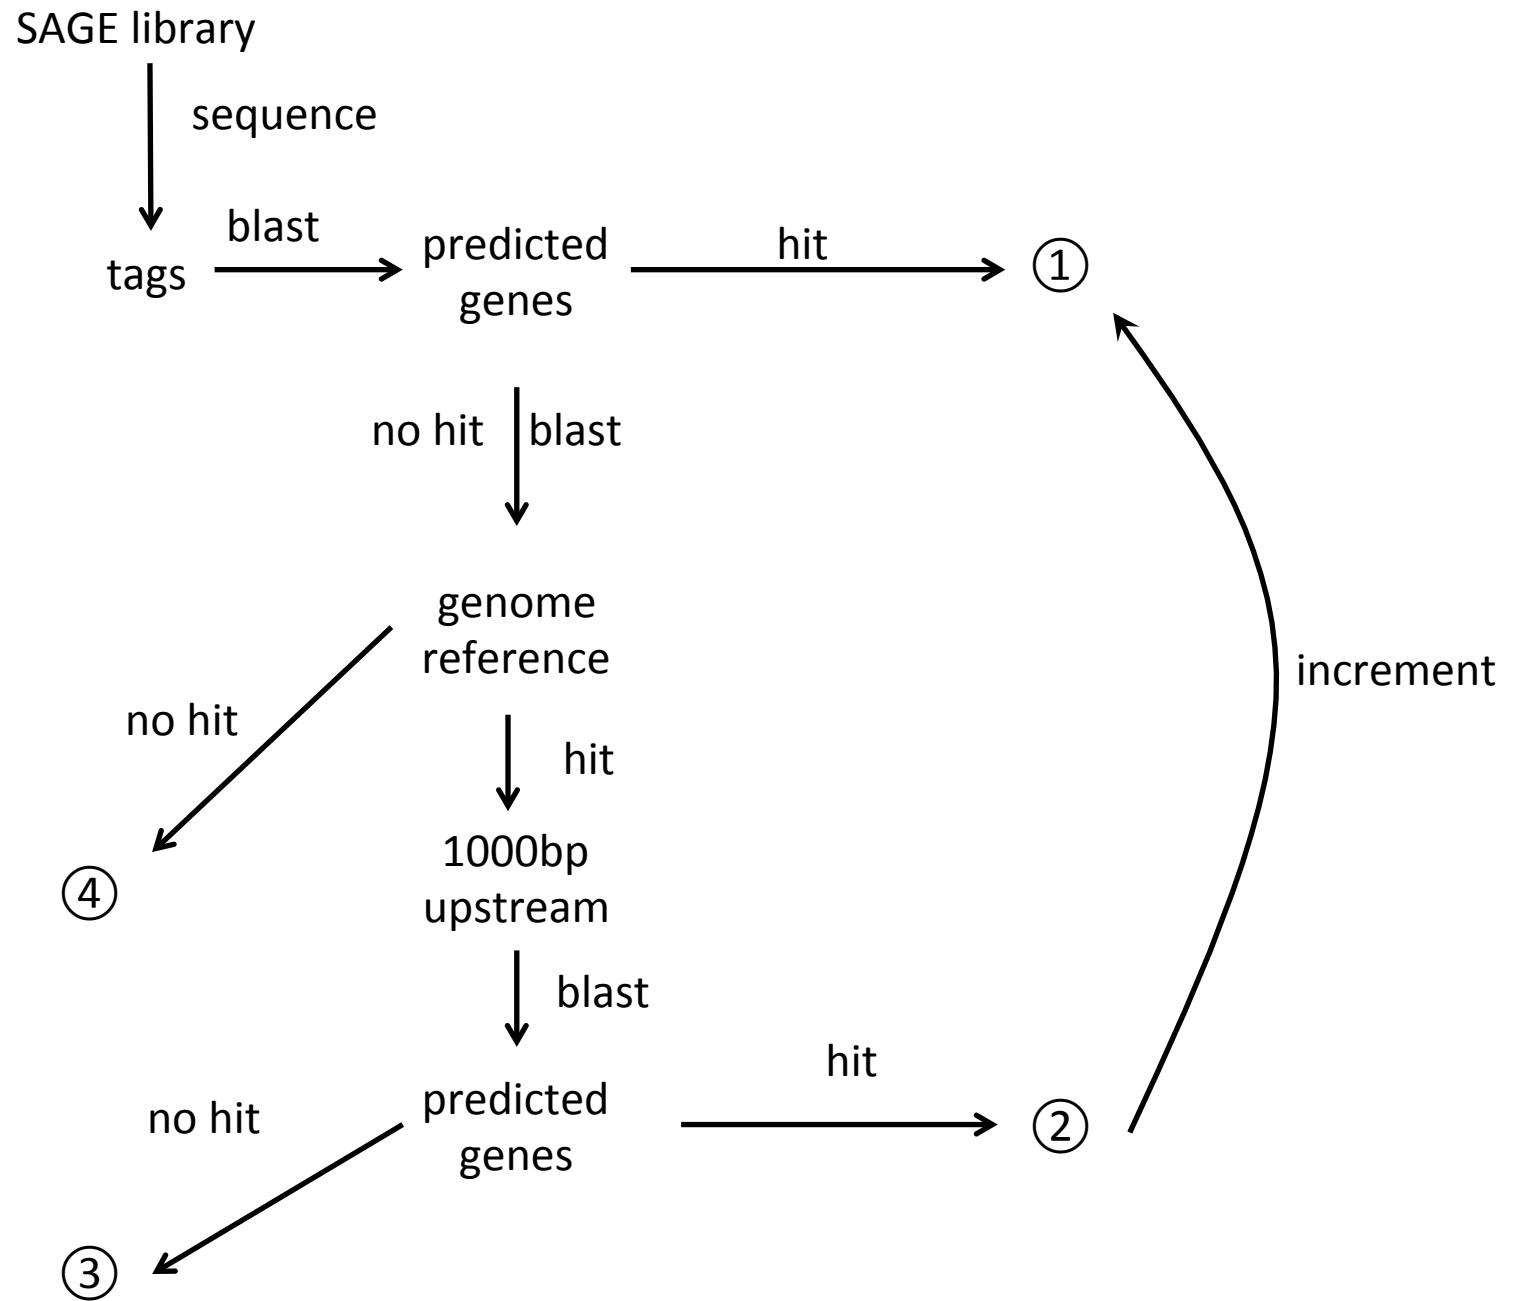

Fig. S1 Scheme of Super-SAGE data analysis. Numbers are compatible with Fig S2.

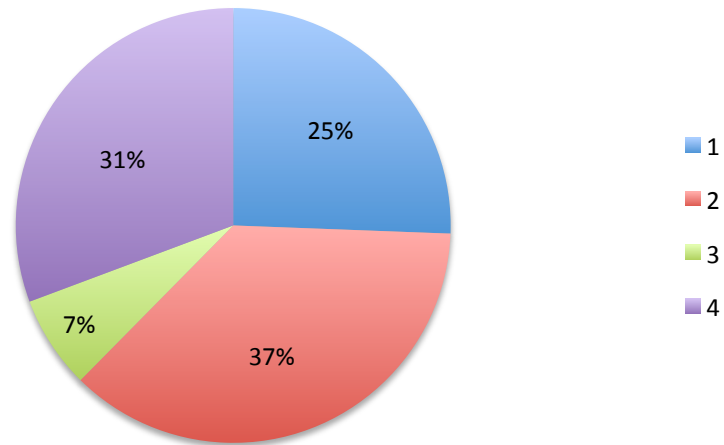

- 1: hit with predicted genes
- 2: hit with genome that contains predicted genes
- 3: hit with genome that does not contain predicted genes
- 4: no hit

Fig. S2 Matching results of Super-SAGE tags with predicted genes and reference genome sequence of *Lentinula edodes*. Numbers are compatible with Fig S1.

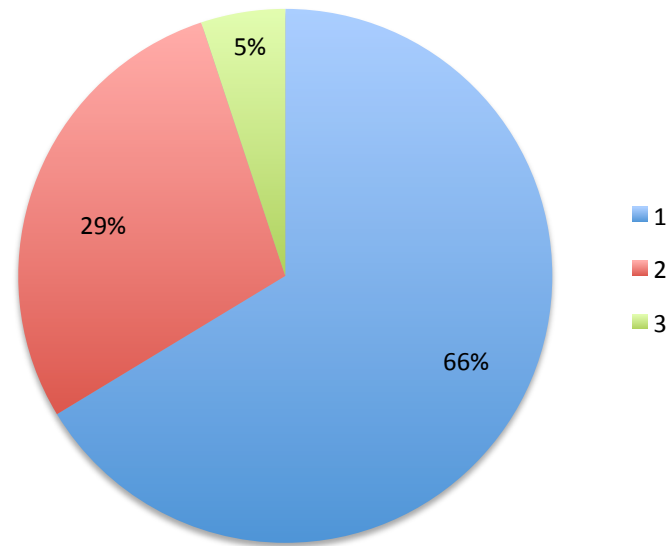

1: expressed more than 2 fold change in postharvest fruiting body compare with fresh fruiting body, and estimated as DEG

2. expressed more than 2 fold change in postharvest fruiting body compare with fresh fruiting body, and not estimated as DEG

3. expressed less than 2 fold change in postharvest fruiting body compare with fresh fruiting body, and not estimated as DEG

Fig. S3 Comparison between PCR-subtraction data and Super-SAGE data. Fold changes of in Super-SAGA data of genes that are estimated as true positive genes upregulated after harvest in PCR-subtraction data (Y. Sakamoto, K. Nakade, and T. Sato, *Curr Genet* 55:409-423, 2009, doi: 10.1007/s00294-009-0255-9) were summarized.

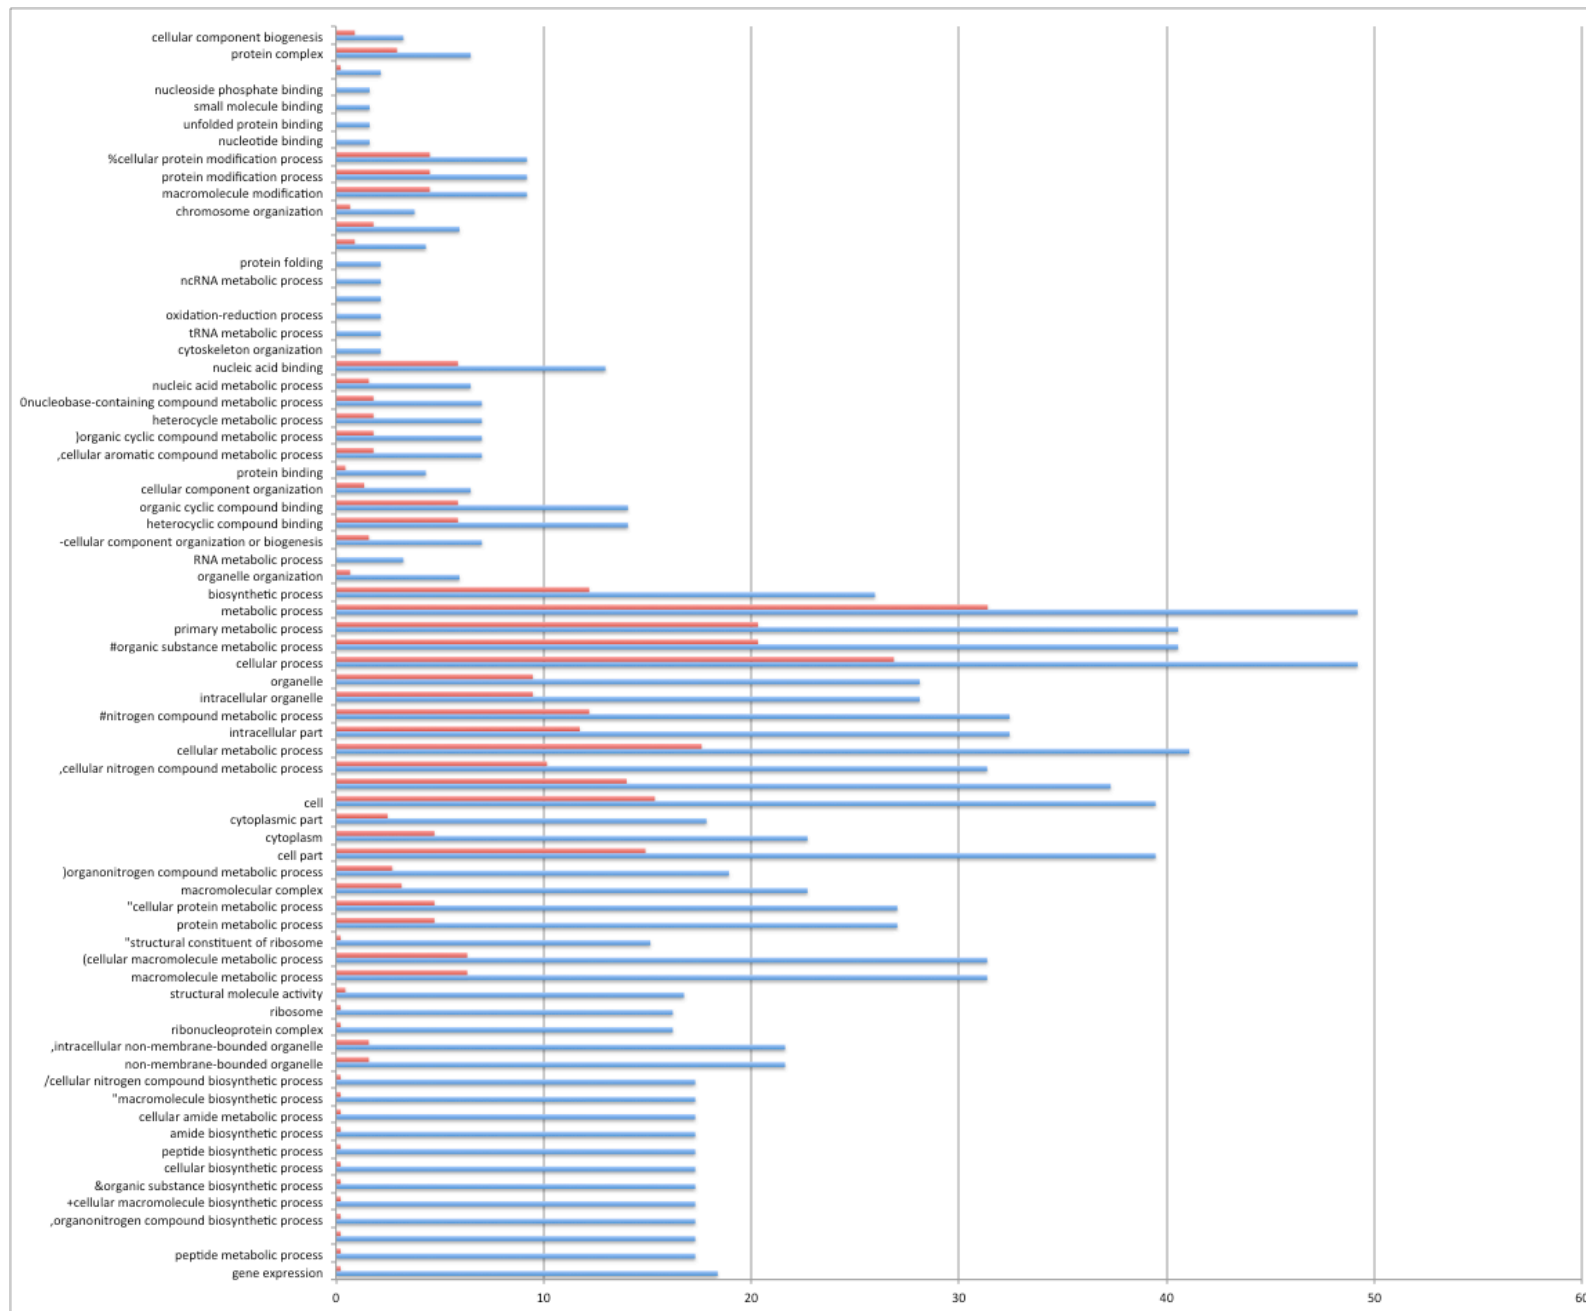

Fig. S4 Comparison of enriched gene ontology between fruiting body after harvest and fresh fruiting body (just after harvest) by using Blast2GO enrichment analysis (Fisher's Exact Test). Blue and red bars indicate enriched gene ontology in the fresh fruiting bodies and fruiting bodies after harvest, respectively. X-axis indicates number of genes enriched.

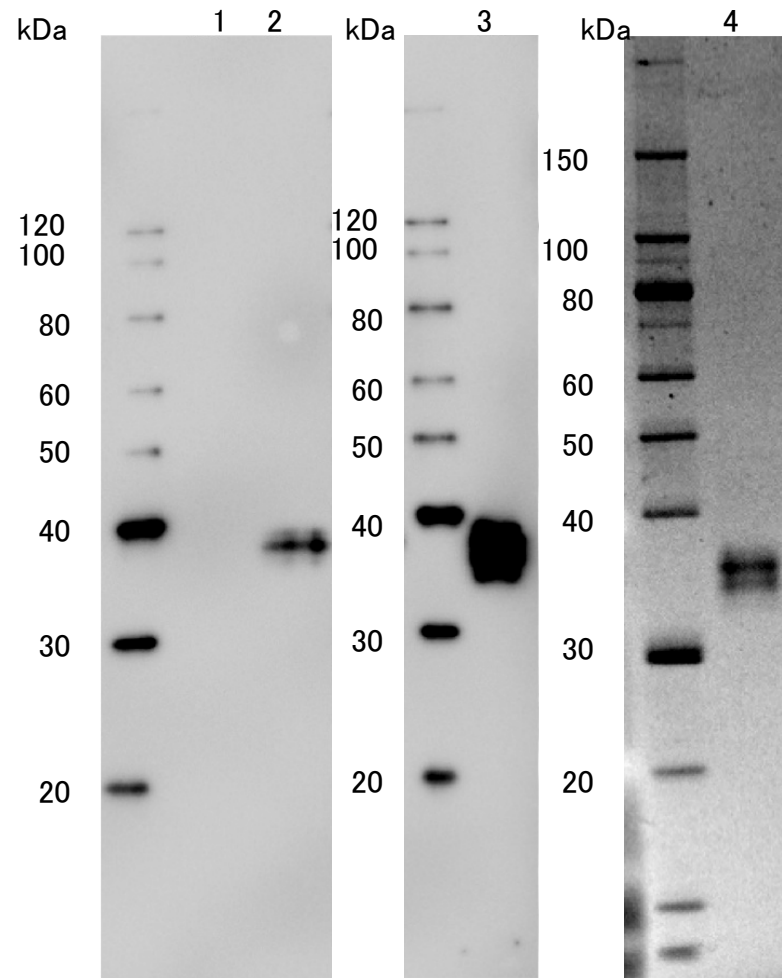

Fig. S5 Purification of GH16 enzyme, MLG1, using His-tag column, phenyl column, and MonoQ. (lane1) Western blot analysis of crude enzymes secreted from wild type *A. oryzae* strain, RIB40 visualized by MLG1 antiserum, (lane2) western blot analysis of crude enzymes secreted from *A. oryzae* transformed *mlg1* expression vector visualized by MLG1 antiserum and (lane3) western blot analysis of purified rMLG1 visualized by MLG1 antiserum (lane 4) purified rMLG1 visualized by Oriole™ staining.

Table S1 De novo assemble and scaffolding of the *L. edodes* genome.

|               | clc genomics workbench<br>(paired end) | SSPACE<br>(mate pair) | PBJelly<br>(long reads) |
|---------------|----------------------------------------|-----------------------|-------------------------|
| contig number | 7,731                                  | 3,242                 | 1,951                   |
| N50(bp)       | 36,146                                 | 69,696                | 103,018                 |
| total (bp)    | 35,042,971                             | 34,981,635            | 38,944,209              |

Table S3 Number of CAZy enzymes involved in lignocellulose degradation in basidiomycetous fungi.

| plant cell wall polysaccharide degrading |                                                |       |       |       |       |                     |                     |                     |                     |                     |                     |                     |                                  |
|------------------------------------------|------------------------------------------------|-------|-------|-------|-------|---------------------|---------------------|---------------------|---------------------|---------------------|---------------------|---------------------|----------------------------------|
| Caazy family                             | enzyme                                         | Lened | Gymlu | Ompol | Monpe | Copci <sup>1)</sup> | Schco <sup>1)</sup> | Lacbi <sup>1)</sup> | Phach <sup>1)</sup> | Aurde <sup>1)</sup> | Cryne <sup>1)</sup> | Ustma <sup>1)</sup> | reputed gene in <i>L. edodes</i> |
| GH1                                      | $\beta$ -glucosidase                           | 3     | 3     | 3     | 7     | 2                   | 3                   | 0                   | 2                   | 1                   | 0                   | 0                   |                                  |
| GH3                                      | $\beta$ -glucosidase                           | 12    | 15    | 10    | 13    | 7                   | 12                  | 2                   | 11                  | 14                  | 7                   | 3                   |                                  |
| GH6                                      | endoglucanase                                  | 1     | 1     | 1     | 3     | 5                   | 1                   | 0                   | 1                   | 2                   | 0                   | 0                   |                                  |
| GH7                                      | endo- $\beta$ -1,4-glucanase                   | 4     | 7     | 3     | 5     | 6                   | 2                   | 0                   | 9                   | 8                   | 0                   | 0                   |                                  |
| GH10                                     | endo-1,4- $\beta$ -xylanase                    | 4     | 5     | 4     | 8     | 5                   | 5                   | 0                   | 6                   | 4                   | 0                   | 2                   |                                  |
| GH28                                     | polygalacturonase                              | 13    | 19    | 8     | 4     | 3                   | 3                   | 7                   | 4                   | 14                  | 1                   | 1                   |                                  |
| AA9                                      | copper-dependent polysaccharide monooxygenases | 12    | 13    | 12    | 17    | 33                  | 22                  | 13                  | 15                  | 20                  | 1                   | 0                   |                                  |
| lignin degrading                         |                                                |       |       |       |       |                     |                     |                     |                     |                     |                     |                     |                                  |
|                                          |                                                | Lened | Gymlu | Ompol | Monpe | Copci               | Schco               | Lacbi               | Phach               | Aurde               | Cryne               | Ustma               | reputed gene in <i>L. edodes</i> |
| AA1                                      | multicopper oxidase                            | 14    | 19    | 9     | 27    | 17                  | 6                   | 13                  | 5                   | 8                   | 5                   | 4                   | <i>lcc1~14</i>                   |
| AA2                                      | POD(Lip)                                       | 5(0)  | 5(0)  | 5(0)  | 1(0)  | 0                   | 0                   | 0                   | 15(10)              | 5                   | 0                   | 0                   | <i>mnp1, mnp2</i>                |

Lened: *Lentinula edodes*, Gymlu: *Gymnopus luxurians*, Ompol: *Omphalotus olearius*, Monpe: *Moniliophthora perniciosa*, Copci: *Coprinopsis cinerea*, Schco: *Schizophyllum commune*, Lacbi: *Laccaria bicolor*, Phach: *Phanerochaete chrysosporium*, Aursu: *Auricularia subglabra*, Cryne: *Cryptococcus neoformans*, Ustma: *Ustilago maydis*

1) Data was based on each genome sequences in MycoCosm (<http://genome.jgi.doe.gov/programs/fungi/index.jsf>)

Table S5 Functional clustering of genes enriched in the fruiting bodies after harvest. The data were analyzed using DAVID.

| Annotation Cluster    | Term                                     | Enrichment Score |
|-----------------------|------------------------------------------|------------------|
| Annotation Cluster 1  | Glucose/ribitol dehydrogenase            | 2.750051669      |
| Annotation Cluster 2  | General substrate transporter            | 2.269550536      |
| Annotation Cluster 3  | Cytochrome P450                          | 1.427520501      |
| Annotation Cluster 4  | Amino acid/polyamine transporter         | 1.380667976      |
| Annotation Cluster 5  | cation antiporter activity               | 1.375886513      |
| Annotation Cluster 6  | ABC transporter-like                     | 1.142828599      |
| Annotation Cluster 7  | cellular amino acid catabolic process    | 0.887506891      |
| Annotation Cluster 8  | peroxidase activity                      | 0.84481625       |
| Annotation Cluster 9  | lipase activity                          | 0.773952411      |
| Annotation Cluster 10 | transcription regulator activity         | 0.759688533      |
| Annotation Cluster 11 | GTPase regulator activity                | 0.672818778      |
| Annotation Cluster 12 | cellular amino acid biosynthetic process | 0.671932353      |
| Annotation Cluster 13 | pyridoxal phosphate binding              | 0.641612258      |
| Annotation Cluster 14 | DNA/RNA helicase                         | 0.613633143      |
| Annotation Cluster 15 | ATPase activity                          | 0.576822046      |
| Annotation Cluster 16 | Zinc finger, C2H2-like                   | 0.534503138      |
| Annotation Cluster 17 | carbohydrate binding                     | 0.513359865      |
| Annotation Cluster 18 | ATP binding                              | 0.473831026      |
| Annotation Cluster 19 | Fungal specific transcription factor     | 0.464801781      |
| Annotation Cluster 20 | Tetratricopeptide TPR-1                  | 0.363724625      |
| Annotation Cluster 21 | G-protein coupled receptor protein       | 0.317753313      |
| Annotation Cluster 22 | metal ion transport                      | 0.263101544      |
| Annotation Cluster 23 | monosaccharide metabolic process         | 0.259391798      |
| Annotation Cluster 24 | Protein kinase                           | 0.230133836      |
| Annotation Cluster 25 | cellular macromolecule localization      | 0.071841863      |
| Annotation Cluster 26 | nucleotide biosynthetic process          | 0.039185881      |
| Annotation Cluster 27 | peptidase activity                       | 0.031918821      |
| Annotation Cluster 28 | WD40 repeat                              | 0.008404691      |
| Annotation Cluster 29 | chromosome                               | 0.000122783      |



Table S6 Functional clustering of genes enriched in the fresh fruiting body. The data were analyzed using DAVID.

| Annotation Cluster    | Term                             | Enrichment Score |
|-----------------------|----------------------------------|------------------|
| Annotation Cluster 1  | translation                      | 10.96007435      |
| Annotation Cluster 2  | chromatin assembly               | 1.389517748      |
| Annotation Cluster 3  | monosaccharide catabolic process | 1.082506148      |
| Annotation Cluster 4  | tRNA metabolic process           | 0.529486463      |
| Annotation Cluster 5  | pyridoxal phosphate binding      | 0.39308153       |
| Annotation Cluster 6  | WD40 repeat                      | 0.387654065      |
| Annotation Cluster 7  | ATP binding                      | 0.316090114      |
| Annotation Cluster 8  | Serine/threonine protein kinase  | 0.138631684      |
| Annotation Cluster 9  | peptidase activity               | 0.122788756      |
| Annotation Cluster 10 | oxidoreductase                   | 0.06622579       |
| Annotation Cluster 11 | transcription regulator activity | 0.015368224      |
| Annotation Cluster 12 | metal-binding                    | 9.0021E-05       |

Table S7 Differentially expressed oxidative stress, signal transduction, and cell-death related genes judged as DEG.

| ID        | D0_mean | D4_Mean | Fold change<br>(D4/D0) | p.value | Seq. Description                                              | min. eValue |
|-----------|---------|---------|------------------------|---------|---------------------------------------------------------------|-------------|
| g4385.t1  | 0       | 495.33  | $\infty$               | 5.9E-08 | phenylalanine tyrosine ammonia-lyase                          | 0           |
| g7820.t1  | 0       | 13.33   | $\infty$               | 5.1E-03 | glutathione S-transferase C-terminal-like protein             | 3.87E-16    |
| g6379.t1  | 0       | 16.67   | $\infty$               | 3.4E-05 | glutathione transferase                                       | 9.97E-168   |
| g884.t2   | 0       | 14.67   | $\infty$               | 2.0E-03 | glutathione s-transferase                                     | 3.46E-100   |
| g7820.t1  | 0       | 13.33   | $\infty$               | 5.1E-03 | glutathione S-transferase C-terminal-like protein             | 3.87E-16    |
| g6226.t1  | 1       | 29.67   | 29.67                  | 6.4E-04 | AChain Crystal Structure Of Glutathione Transferase           | 2.31E-24    |
| g4124.t1  | 0.67    | 14.67   | 22                     | 3.0E-03 | glutathione s-transferase                                     | 4.91E-95    |
| g7821.t1  | 65      | 1426.67 | 21.95                  | 7.9E-05 | glutathione S-transferase                                     | 1.72E-82    |
| g8660.t1  | 17      | 179.33  | 10.55                  | 2.4E-03 | glutathione S-transferase C-terminal-like protein             | 5.95E-121   |
| g10274.t1 | 25      | 1135    | 45.4                   | 4.1E-08 | thioredoxin                                                   | 2.88E-48    |
| g9281.t1  | 1.33    | 22      | 16.5                   | 9.1E-04 | l-ascorbate oxidase                                           | 0           |
| g4567.t1  | 0       | 15.67   | $\infty$               | 6.9E-05 | cytochrome p450                                               | 5.82E-174   |
| g4711.t1  | 0       | 11.33   | $\infty$               | 4.4E-04 | cytochrome P450 monooxygenase                                 | 0           |
| g6252.t2  | 0       | 11      | $\infty$               | 1.3E-03 | cytochrome p450                                               | 0           |
| g691.t1   | 0       | 9.33    | $\infty$               | 3.2E-03 | cytochrome p450                                               | 0           |
| g1.t2     | 0       | 8.33    | $\infty$               | 2.1E-03 | cytochrome p450                                               | 0           |
| g7689.t4  | 0       | 7       | $\infty$               | 4.3E-03 | cytochrome P450                                               | 5.45E-174   |
| g2757.t1  | 1.33    | 487     | 365.25                 | 9.3E-07 | D-lactate dehydrogenase [cytochrome]                          | 0           |
| g2738.t1  | 3       | 333     | 111                    | 8.0E-09 | cytochrome p450                                               | 0           |
| g11604.t1 | 7.67    | 508.33  | 66.3                   | 2.5E-09 | cytochrome c peroxidase                                       | 0           |
| g2202.t1  | 3       | 66.67   | 22.22                  | 5.3E-04 | cytochrome P450 monooxygenase                                 | 0           |
| g10671.t1 | 2       | 43.33   | 21.67                  | 2.1E-04 | cytochrome p450                                               | 0           |
| g550.t1   | 3       | 52.33   | 17.44                  | 7.3E-04 | cytochrome p450                                               | 5.27E-141   |
| g2157.t2  | 10.67   | 106.67  | 10                     | 4.4E-04 | QCR6 subunit6 of the ubiquinol cytochrome-c reductase complex | 1.61E-126   |
| g6572.t1  | 3       | 26.67   | 8.89                   | 3.8E-03 | cytochrome p450 monooxygenase pc-3                            | 0           |
| g7735.t1  | 9.33    | 81.33   | 8.71                   | 6.3E-04 | cytochrome c oxidase copper chaperone                         | 2.04E-33    |
| g3972.t2  | 12.67   | 80.67   | 6.37                   | 4.5E-03 | cytochrome P450                                               | 0           |
| g11194.t1 | 0       | 110     | $\infty$               | 1.1E-10 | CMGC MAPK protein kinase                                      | 0           |
| g12.t1    | 0       | 13      | $\infty$               | 1.7E-04 | protein kinase                                                | 1.5E-15     |
| g640.t1   | 15.67   | 731     | 46.66                  | 1.4E-11 | TKL TKL-ccin protein kinase                                   | 0           |
| g10411.t1 | 1.33    | 41.67   | 31.25                  | 4.5E-03 | CMGC MAPK protein kinase                                      | 0           |
| g8811.t1  | 0.67    | 20.67   | 31                     | 1.6E-03 | kinase-like protein                                           | 0           |
| g3286.t1  | 0.67    | 15.33   | 23                     | 2.9E-03 | bud32 protein kinase                                          | 9.11E-132   |
| g10953.t1 | 1.33    | 21.33   | 16                     | 9.8E-04 | CMGC MAPK protein kinase                                      | 0           |
| g3352.t1  | 3       | 42.67   | 14.22                  | 5.2E-03 | kinase-like protein                                           | 0           |
| g4685.t1  | 24.33   | 288.67  | 11.86                  | 1.3E-04 | Pkinase-domain-containing protein                             | 0           |
| g5331.t1  | 70.67   | 837.67  | 11.85                  | 5.8E-06 | kinase-like protein                                           | 0           |
| g3169.t1  | 12.33   | 131.33  | 10.65                  | 5.1E-03 | Pkinase-domain-containing protein                             | 0           |
| g11044.t3 | 17      | 168.67  | 9.92                   | 7.6E-05 | CMGC MAPK protein kinase                                      | 0           |
| g509.t1   | 11      | 93.33   | 8.48                   | 8.3E-04 | serine threonine-protein kinase                               | 0           |
| g8053.t1  | 20      | 147.33  | 7.37                   | 1.2E-03 | other 1 protein kinase                                        | 6.84E-33    |
| g1758.t1  | 161.67  | 992.33  | 6.14                   | 1.7E-03 | kinase-like protein                                           | 5.17E-108   |
| g640.t1   | 15.67   | 731     | 46.66                  | 1.4E-11 | TKL TKL-ccin protein kinase                                   | 0           |
| g615.t1   | 0       | 32.67   | $\infty$               | 7.4E-06 | inositol hexakisphosphate kinase 1                            | 4.03E-179   |
| g11374.t1 | 0       | 8.67    | $\infty$               | 2.6E-03 | Cullin-domain-containing protein                              | 0           |
| g9687.t2  | 17.67   | 244.33  | 13.83                  | 4.1E-06 | vacuolar assembling sorting protein VPS16                     | 0           |
| g10593.t1 | 5.67    | 60      | 10.59                  | 5.3E-04 | Programmed cell death protein 2-like                          | 1.84E-131   |
| g485.t1   | 13.33   | 944.67  | 70.85                  | 2.7E-05 | metacaspase                                                   | 3.63E-165   |
| g9815.t1  | 5.33    | 49      | 9.19                   | 9.9E-04 | subtilisin-like protease                                      | 0           |
